# Supplementary material for: Comparative proteome and peptidome analysis of the cephalic fluid secreted by Arapaima gigas (Teleostei: Osteoglossidae) during and outside parental care
Source: PLoS One. 2017 Oct 24;12(10):e0186692. doi: 10.1371/journal.pone.0186692 (PMC5655490; doi:10.1371/journal.pone.0186692)
Supplement: S1 Table — (XLSX) [file pone.0186692.s001.xlsx]

## Sheet: Suppl Table I
Peptide ID	CE time (min)	Peptide mass (Da)	Sequence peptide	Uniprot assession n°	Protein identity	Primary Gene Name	Difference between groups	Wilcox P-value
376	22.987	894.532	YKRKSTL	E9QI87	Uncharacterized protein	zgc:162971	PF>F	0.0386459
652	28.7802	956.536	LDAVVSPRT				PF>F	0.0386459
689	28.853	964.497	KANANLTSF				PF>F	0.00783767
725	29.0518	974.546	LPLQDVYK	Q7ZWA1	Elongation factor 1-alpha (Fragment)	si:dkey-37o8.1	PF>F	0.0386459
784	36.1345	986.54	LTAQLSQLN	E7FC83	Uncharacterized protein	LOC101886519	PF>F	0.0386459
879	35.8455	1006.55	TISTSTVSVL	F8QXP5	Rank (Fragment)	tnfrsf1b	PF>F	0.0386459
887	28.7817	1008.51	EAFSAICRL				PF>F	0.0386459
896	23.4483	1010.52	KGPQKYGSF	X1WH84	Uncharacterized protein	ptprnb	PF>F	0.0386459
940	29.0405	1019.56	TIKCVICQL	E7F8D5	Uncharacterized protein	ldb3a	PF>F	0.0386459
985	29.9868	1030.57	DVNSAIATIK	Q6NWJ5	Tubulin alpha 6	tuba8l4	PF>F	0.0386459
1073	29.5447	1053.61	VPEEIKQVI	B0V153	Methylenetetrahydrofolate reductase	mthfr	PF>F	0.0386459
1194	30.0716	1086.59	KDQISPAISL	X1WEW9	Uncharacterized protein	si:ch211-167j9.4	PF>F	0.0371944
1266	30.2908	1104.6	ISSASPVKSTL	F1QNB3	Uncharacterized protein (Fragment)	ank3b	PF>F	0.00783767
1472	39.3355	1160.6	ELTAVPFVNGV				PF>F	0.0386459
1488	21.616	1163.74	IIKALKEPPR	Q5BKW5	Ribosomal protein L12	rpl12	PF>F	0.0386459
1543	29.5205	1177.64	KYLGINSEGVV				PF>F	0.0386459
1565	26.618	1183.6	TVPPLAANHQH				PF>F	0.0386459
1809	31.1662	1244.67	TRTPEELTILG	E7F798	Chloride channel protein	clcn6	PF>F	0.0386459
1885	30.751	1262.66	LSENTSAMIIGK	F1QCY7	Uncharacterized protein (Fragment)	pak7	PF>F	0.0386459
1900	31.4778	1266.7	LEGGDIPLQGLR	F1QBE7	Uncharacterized protein (Fragment)	sorbs1	PF>F	0.0386459
1901	26.4342	1266.69	KSLEIIDFFR	E7F541	Uncharacterized protein	atg9b	PF>F	0.0386459
2006	31.462	1290.7	TQTVTLDMAAKI				PF>F	0.0386459
2277	31.712	1355.7	EIDIQASDKGIAP	E7FF57	Uncharacterized protein	LOC100535010	PF>F	0.0386459
2653	32.3815	1442.8	LSQRENLLFLNP	E7F8M6	Uncharacterized protein		PF>F	0.00783767
2719	32.4013	1459.76	TEALMALTAAPSLR				PF>F	0.0386459
2749	33.172	1466.84	VEENANVVVRLLI	F1QEX9	Uncharacterized protein (Fragment)	ryr1b	PF>F	0.0386459
3021	26.7513	1535.81	LKGEIDPHIALDLC	Q6NYI7	Zgc:77563	pla2g7	PF>F	0.0386459
3044	33.089	1542.86	KPSWTSALPLVCIL	B1N746	Interleukin 15 receptor alpha isoform 11	IL-15RA	PF>F	0.0386459
3125	33.198	1564.79	ESAHPPAFVDLQAAL	E9QFI8	Uncharacterized protein	si:dkey-83m22.7	PF>F	0.0386459
3237	53.1207	1593.79	LPTTTVSPTMTTVMV	X1WG18	Uncharacterized protein	muc5.2	PF>F	0.0386459
3251	33.909	1594.85	SPGTIEIVTVTQVVH				PF>F	0.0386459
3332	26.991	1616.81	MEKPNVRWSDVAGL	Q08BZ6	Vacuolar protein sorting 4a (Yeast)	vps4a	PF>F	0.0386459
3359	33.5416	1624.92	IGGIGTVPVGRVETGTL	A2VCX2	Elongation factor 1-alpha	eef1a1l2	PF>F	0.0457816
3399	52.9788	1635.77	PAQQQQQPQSQPQQ	U3JAU2	Uncharacterized protein	tnrc6b	PF>F	0.0386459
3441	33.3345	1645.74	PGRPGEEGPQGPPGEPG	Q8JGL8	Type IX collagen alpha 2	col9a2	PF>F	0.0386459
3476	33.19	1654.84	SPAPSSPTPRPPSPPPA	E9QG28	Uncharacterized protein	ppp2r3a	PF>F	0.0386459
3484	53.2367	1656.7	NCGEPLEAVGSAYFGQ				PF>F	0.0386459
3493	33.458	1658.94	DLPALIKDLVYTVAL	Q1LUJ4	Uncharacterized protein	fuca1.2	PF>F	0.0386459
3513	33.4919	1664.81	QGKPGAPGEPGLAGVPGE	Q1L863	Uncharacterized protein (Fragment)	col8a1b	PF>F	0.025585
3515	42.1412	1664.84	AEAVAAPAEAVAAPPEAV	F1QJI9	Histone-lysine N-methyltransferase	setd2	PF>F	0.0386459
3529	33.282	1668.84	VRSQGPAVSPQPISQS	B0UXI4	Uncharacterized protein	syn1	PF>F	0.0386459
3544	33.2972	1672.88	CKVSIIPPTALNSIDS	F1RC67	Diacylglycerol kinase (Fragment)	dgkh	PF>F	0.0386459
3568	33.6744	1678.9	TPTPLPSGADLVVPQR	E0YA53	Calcineurin binding protein 1	cabin1	PF>F	0.00783767
3812	34.1154	1747.94	TPGVKGPAGIPGVQGPVGL	E7FE47	Uncharacterized protein	col5a2b	PF>F	0.00783767
3910	34.1108	1775.01	LPPNLLALFAPRDPIP	Q503W8	Snrnp70 protein (Fragment)	snrnp70	PF>F	0.0246352
3918	33.8336	1776.88	KPNLNAGATPTSYVIEA	E7FDW5	Uncharacterized protein	robo1	PF>F	0.0386459
3947	34.4425	1783.94	LSGTPLPSLQSLSLCPR	E7FE22	Uncharacterized protein	inpp5ja	PF>F	0.0386459
3965	28.295	1787.91	RSLDTGSDDINIIKNQ	F1QM62	Uncharacterized protein (Fragment)	snx13	PF>F	0.0386459
3976	19.0095	1789.99	GAHQNIIPASTGAAKAVGK	F1R3D3	Glyceraldehyde-3-phosphate dehydrogenase	gapdhs	PF>F	0.00783767
3987	34.0423	1792.93	PSPSVPPHPAPPPPPPLP	F1QVE2	Uncharacterized protein (Fragment)	pcdh15b	PF>F	0.0457816
3998	34.056	1796.94	DKIIESSQPEVEVIPV				PF>F	0.0386459
4012	33.9168	1799.88	DNPPVAFKSPVPVGIAE	I3IT71	Uncharacterized protein (Fragment)	zgc:152948	PF>F	0.0160278
4072	28.2102	1817.89	PSVEVFFQSVKSSSMK				PF>F	0.0110479
4115	34.1843	1831.95	KPLPTPIGPIPTDTPQP	A7MC91	Csnk1g2b protein	csnk1g2b	PF>F	0.0386459
4293	28.7327	1882	KPAPVRYEEPPPPPPPV	X1WHN9	Uncharacterized protein	tjp1b	PF>F	0.0338177
4420	34.4005	1921.03	LAAARALELAPPIPADSTP				PF>F	0.0386459
4544	28.9725	1963.99	EEGKNAINAPLLHTSPEL	X1WCE0	Uncharacterized protein	parvb	PF>F	0.0131633
4585	42.5115	1978	QPVASPNPIYTPVPPVAPA	Q5BU19	Ribeye a protein	ctbp2a	PF>F	0.0386459
4661	34.8828	2001.98	QSKDLCLSGTPSSAAAPAVSP	E7FE43	Uncharacterized protein	lrfn2b	PF>F	0.0386459
4765	35.3088	2037.98	KAVFVMVNPQTESSASAAGE	F1QS95	Uncharacterized protein	prx	PF>F	0.0386459
4934	29.284	2092.1	LKNIGNNFFKAQNWQSAI	Q6IQL7	Peptidylprolyl isomerase D (Cyclophilin D)	ppid	PF>F	0.0386459
4942	34.996	2095	SPGQTPLGGPHTLSSPPTSLT	E7FFV5	Uncharacterized protein	si:ch211-114m9.1	PF>F	0.0386459
5100	33.8323	2148.01	EFSDTLFSTLASHQPVAWP	F1QKC3	Uncharacterized protein (Fragment)	mlxip	PF>F	0.00783767
5132	30.1455	2155.15	KFKDLDLTNLYAPPPPPLT	A5D6U6	Akap1b protein	akap1b	PF>F	0.0386459
5212	29.869	2176.2	IALKGINRVLAQDPMGVPPGM	E7F2F7	Histone-lysine N-methyltransferase	kmt2d	PF>F	0.0386459
5213	25.6562	2176.14	ADEINVWREKDGRLSIYI				PF>F	0.0386459
5343	25.0123	2216.18	KGLKGFQGPPGPPGTRGLPGPPG	X1WCX6	Uncharacterized protein	si:ch211-196i2.2	PF>F	0.0386459
5565	30.2661	2277.21	ALPAAASGPGAPRTPPMPKPPSPP	E7F092	Uncharacterized protein	cdk13	PF>F	0.0458641
5590	25.63	2286.2	RLSTASSVTKPPHFILTTEW	B5DDZ3	Parp12a protein	parp12a	PF>F	0.0386459
6032	31.7068	2473.35	PAENIIAIAATNNLYIFQDRVK				PF>F	0.00783767
6317	28.7295	2602.44	VKNISTQIPTILGAAESPGAVVLHVG	A9JRX8	LOC797572 protein	zgc:77327	PF>F	0.0386459
6703	24.8193	2768.49	HVPRAVFVDLEPTVIDEVRTGTYR	Q6NWJ5	Tubulin alpha 6	tuba8l4	PF>F	0.0386459
1045	29.759	1044.58	QTLVDGKVVS	B2GQG8	Krt18 protein	krt18	F>PF	0.0192022
1479	30.3575	1161.61	KQFLDNLGVE	Q5TYQ3	Cytochrome c oxidase assembly factor 7	coa7	F>PF	0.0380037
1766	31.1314	1234.62	RLWLTSYPSP	E7FGS8	Uncharacterized protein	dnah12	F>PF	0.00886903
6258	26.5966	2568.33	HSLPSLVTPISNKQRMSILVMAD				F>PF	0.0472554
921	29.5293	1014.58	DVNAAIATIK	B8A516	Uncharacterized protein	tuba1b	F>M	0.0491832
946	29.3863	1021.53	KDGNPGLPGPA	F1Q593	Uncharacterized protein	si:dkey-27a13.3	F>M	0.0393348
989	29.5383	1031.55	KADTTSTVPI	F1QUP3	Uncharacterized protein	ehmt1b	F>M	0.0491832
1045	29.759	1044.58	QTLVDGKVVS	B2GQG8	Krt18 protein	krt18	F>M	0.0258376
1076	29.9195	1054.6	LALIGKTADGP	R4GEK7	Uncharacterized protein	spint2	F>M	0.0491832
1104	39.3884	1061.53	SPDEIPFII	A4FVN1	Hmha1 protein (Fragment)	hmha1b	F>M	0.0491832
1697	24.6935	1214.69	TPTSDNKIVLK	Q1LUA6	Triple functional domain protein	trio	F>M	0.0393348
2465	32.1609	1396.69	LSGGALGHVTSNTPS	E7FC98	Uncharacterized protein		F>M	0.0403301
2548	51.2878	1417.6	PAGPTGQGSELDGGSG	E7FBN5	Uncharacterized protein		F>M	0.0280434
2685	32.9356	1449.87	APAVVPVVVPITRT	F1R9S8	Uncharacterized protein	ktn1	F>M	0.0491832
3618	27.8537	1692.93	LLPQLPPEGRDRALS	E7F9F7	Sodium channel protein		F>M	0.031214
4518	34.3647	1953.96	EPEQESLRPPAGLSWLN	I3IT38	Uncharacterized protein	march7	F>M	0.00164325
4890	29.7128	2079.07	QASGVPHIPVQNEVFARAQ	R4GDU6	Uncharacterized protein	si:ch211-207i1.2	F>M	0.0491832
107	27.5691	830.45	VIGDSGVGK	G1K2X3	Rab-like protein 3	rabl3	M>F	0.0194637
170	27.6833	845.445	ARPVMSVS	A1A5I3	LOC557935 protein (Fragment)	zmp:0000001082	M>F	0.0194637
424	23.0975	905.44	FEFAQKH	E9QFS4	Uncharacterized protein	zgc:113274	M>F	0.031214
860	29.048	1002.53	ERDTLVSAL	E7FAN6	Kinesin-like protein	kif20ba	M>F	0.031214
904	23.4062	1011.6	KVESLRAPL	Q5TYP2	Uncharacterized protein	zp3a.2	M>F	0.00701937
940	29.0405	1019.56	TIKCVICQL	E7F8D5	Uncharacterized protein	ldb3a	M>F	0.0194637
1025	30.6488	1041.49	AMVGYCGTLK	Q7T2G0	Tetraspanin	tspan12	M>F	0.00606283
1108	29.5219	1062.48	TQDEGDAIKS	Q8QGB8	DNA (cytosine-5)-methyltransferase	dnmt1	M>F	0.031214
1541	24.9779	1176.67	AELYLEALKK	A9JTH4	Zgc:175226 protein	slc26a6l	M>F	0.00268844
1560	30.6229	1181.6	SIGAGASVSLSHP	E7FCA0	Uncharacterized protein	snphb	M>F	0.0185678
1791	31.2578	1239.61	ETYLIVGCSQK				M>F	0.00701937
2318	25.6158	1361.78	ISAVPVKTQPSVH	Q1LYF7	Novel protein similar to vertebrate cell adhesion molecule-related/down-regulated by oncogenes (CDON)	DKEY-79N12.1-001	M>F	0.0283979
2717	26.3102	1458.73	ENRFTVRPNVDP	E7F418	Uncharacterized protein	msh5	M>F	0.0194637
2719	32.4013	1459.76	TEALMALTAAPSLR				M>F	0.0194637
2829	26.2492	1487.79	EMINRELQISQK	X1WGW7	Uncharacterized protein	ints1	M>F	0.0194637
2956	33.0007	1519.83	PPPLPVQKAVGSTPT	Q501U6	Zgc:113078	sh3d19	M>F	0.0194637
3024	32.8887	1536.79	DDIVNLQNPPLRQ	F2Z4W6	Uncharacterized protein	LOC799523	M>F	0.0194637
3239	33.1797	1593.79	LAVDGRWVLYGTMGG	E7FB99	Uncharacterized protein	LOC796473	M>F	0.0424182
3316	27.2918	1610.85	ATPTRKIASMPAPAAP	Q4KMK8	POU domain protein	pou2f1a	M>F	0.0194637
3613	27.3325	1691.85	LTVYARDGGSPPNFAK				M>F	0.0194637
3695	33.5024	1716.89	ICSIPGLPGAPGKPGPPGA	E7F3N3	Uncharacterized protein	CABZ01048675.1	M>F	0.0438892
3765	33.9141	1736.88	SIALAAEDPVWPESPR	E9QJF6	Uncharacterized protein	cacna1aa	M>F	0.0297416
3878	33.7941	1766.84	PMATPSLPLSPAPDRDA				M>F	0.016087
4629	34.6244	1992	PAADFFLVEKPSISPQNT	Q0P4D6	Transcription elongation factor, mitochondrial	tefm	M>F	0.0245762
4650	29.0784	1998.06	QVEDTISKALNTLVNEPK	E7F3Q4	Uncharacterized protein	wu:fc34e06	M>F	0.0194637
5212	29.869	2176.2	IALKGINRVLAQDPMGVPPGM	E7F2F7	Histone-lysine N-methyltransferase	kmt2d	M>F	0.0194637
6191	30.1136	2539.15	DEEAPTQIVPDITKTDYYHSTT	A5X6X5	Titin a	ttna	M>F	0.0491832
6962	27.7514	2905.52	NKGVQPLLDAITAYLPAPNERNHDLV	A0JMI9	Ribosome-releasing factor 2, mitochondrial	gfm2	M>F	0.0245762
1431	30.256	1152.63	KELYVFGGLQ	E7FFD1	Uncharacterized protein	zgc:163014	PM>M	0.0450557
2045	31.7915	1301.69	PTPSFPKSPALL	I3ISD8	Uncharacterized protein	ahdc1	PM>M	0.00700802
2465	32.1609	1396.69	LSGGALGHVTSNTPS	E7FC98	Uncharacterized protein		PM>M	0.0450557
3066	19.0599	1546.83	KSKGSVENSDKPKK				PM>M	0.0450557
3173	21.1184	1576.71	IMGSSRHRMTPDGT	F1R7R3	Uncharacterized protein	hmcn1	PM>M	0.022719
1025	30.6488	1041.49	AMVGYCGTLK	Q7T2G0	Tetraspanin	tspan12	M>PM	0.0263887
1045	29.759	1044.58	QTLVDGKVVS	B2GQG8	Krt18 protein	krt18	M>PM	0.0322705
1541	24.9779	1176.67	AELYLEALKK	A9JTH4	Zgc:175226 protein	slc26a6l	M>PM	0.0263887
1561	39.746	1182.59	TIGFGDYVALQ	E7F9D1	Uncharacterized protein	kcnk3b	M>PM	0.037373
2031	25.4184	1298.75	KRSALPLSISDI	E7F348	Uncharacterized protein	vwa5b1	M>PM	0.0322705
2238	31.8467	1345.73	YTQGPNLDLVVK				M>PM	0.0322705
2475	32.5244	1398.68	EAAGPSDLGGVPWK	F1QH17	Protein-methionine sulfoxide oxidase mical3a	mical3a	M>PM	0.0322705
3128	33.2464	1565.88	VPPIRDPLSEGLII	F1R8Z8	Uncharacterized protein (Fragment)	ncor2	M>PM	0.00680651
3370	33.4763	1627.87	RIFNIIADPPSPVAS	E7F372	Uncharacterized protein	rasa1b	M>PM	0.0322705
3423	33.5412	1640.81	TVTDPVHDIAFAPNL	I3ISK9	Nucleoporin seh1 (Fragment)	seh1l	M>PM	0.0366395
3822	34.0169	1749.91	KPPAEPSPLLLNVAEQ	F1Q897	Uncharacterized protein (Fragment)	magi2	M>PM	0.0322705
6246	26.9283	2562.26	QQPSANHSTPSAPAPPTFDRSLKP	F1QW91	Uncharacterized protein	stambpb	M>PM	0.0322705
847	29.1405	999.536	RAVSVSTPAP	F8W3X0	Uncharacterized protein (Fragment)	otud4	PF>PM	0.0253699
1045	29.759	1044.58	QTLVDGKVVS	B2GQG8	Krt18 protein	krt18	PF>PM	0.0253699
3370	33.4763	1627.87	RIFNIIADPPSPVAS	E7F372	Uncharacterized protein	rasa1b	PF>PM	0.0253699
4012	33.9168	1799.88	DNPPVAFKSPVPVGIAE	I3IT71	Uncharacterized protein (Fragment)	zgc:152948	PF>PM	0.0253699
4072	28.2102	1817.89	PSVEVFFQSVKSSSMK				PF>PM	0.00749496
4293	28.7327	1882	KPAPVRYEEPPPPPPPV	X1WHN9	Uncharacterized protein	tjp1b	PF>PM	0.0253699
6451	27.0786	2646.45	TGVAEVPPGTPNVLRASHLLNTLYK	F1QBQ4	Uncharacterized protein	tubgcp5	PF>PM	0.0449086
2045	31.7915	1301.69	PTPSFPKSPALL	I3ISD8	Uncharacterized protein	ahdc1	PM>PF	0.0361451
